# Supplementary material for: How hydrothermal synthesis improves the synthesis of (Zr,Ce)SiO4 solid solutions
Source: Royal Society of Chemistry journal article supplement (doi:10.1039/d3dt01524f), 2023-01-01
Supplement: d3dt01524f1.pdf [file d3dt01524f1.pdf]

# How hydrothermal synthesis improves the synthesis of (Zr,Ce)SiO<sub>4</sub> solid solutions

Thomas Barral<sup>1</sup>, Paul Estevenon<sup>2</sup>, Yann Chanteau<sup>1</sup>, Thibault Kaczmarek<sup>1,2</sup>,  
Andrew C. Strzelecki<sup>3,4,5</sup>, Denis Menut<sup>6</sup>, Eleonore Welcomme<sup>2</sup>, Stephanie Szenknect<sup>1</sup>,  
Philippe Moisy<sup>2</sup>, Xiaofeng Guo<sup>3,4</sup>, Nicolas Dacheux<sup>1,\*</sup>

<sup>1</sup> ICSM, Univ Montpellier, CNRS, CEA, ENSCM, Bagnols-sur-Cèze, France

<sup>2</sup> CEA, DES, ISEC, DMRC, Univ Montpellier, Marcoule, France.

<sup>3</sup> Department of Chemistry, Washington State University, Pullman, Washington 99164, United States

<sup>4</sup> School of Mechanical and Materials Engineering, Washington State University, Pullman, Washington 99164, United States

<sup>5</sup> Earth and Environmental Sciences Division, Los Alamos National Laboratory, P.O. Box 1663, Los Alamos, NM 87545, USA

<sup>6</sup> Synchrotron SOLEIL L'Orme des Merisiers, Saint-Aubin, BP 48, F-91192 Gif-sur-Yvette Cedex France

## SUPPORTING INFORMATION

**Table SI 1.** Synthesis parameters for the presented (Zr,Ce)SiO<sub>4</sub> hydrothermal syntheses.

| Label | Zr:Ce mol ratio | C <sub>Zr</sub> (mol·L <sup>-1</sup> ) | C <sub>Ce</sub> (mol·L <sup>-1</sup> ) | pH <sub>initial</sub>                                       | T (°C) | Δt (days) | Final phase                                                      |
|-------|-----------------|----------------------------------------|----------------------------------------|-------------------------------------------------------------|--------|-----------|------------------------------------------------------------------|
| (1)   |                 |                                        |                                        | [H <sub>3</sub> O <sup>+</sup> ] =<br>1 mol·L <sup>-1</sup> |        |           | ZrSiO <sub>4</sub>                                               |
| (2)   |                 |                                        |                                        | 1.0                                                         |        |           | ZrSiO <sub>4</sub>                                               |
| (3)   |                 |                                        |                                        | 2.0                                                         |        |           | ZrSiO <sub>4</sub> + ε ZrO <sub>2</sub>                          |
| (4)   |                 |                                        |                                        | 3.1                                                         |        |           | ZrSiO <sub>4</sub> + ε ZrO <sub>2</sub>                          |
| (5)   |                 |                                        |                                        | 4.1                                                         |        |           | ZrSiO <sub>4</sub>                                               |
| (6)   | 100:0           | 0.20                                   | 0                                      | 4.9                                                         | 250    | 20        | ZrSiO <sub>4</sub>                                               |
| (7)   |                 |                                        |                                        | 6.0                                                         |        |           | ZrSiO <sub>4</sub>                                               |
| (8)   |                 |                                        |                                        | 7.0                                                         |        |           | ZrSiO <sub>4</sub>                                               |
| (9)   |                 |                                        |                                        | 8.0                                                         |        |           | ZrSiO <sub>4</sub>                                               |
| (10)  |                 |                                        |                                        | 9.0                                                         |        |           | ZrSiO <sub>4</sub>                                               |
| (11)  |                 |                                        |                                        | 10.0                                                        |        |           | ZrSiO <sub>4</sub> + another phase                               |
| (12)  |                 |                                        |                                        | 11.7                                                        |        |           | another phase                                                    |
| (13)  | 100:0           | 0.20                                   | 0                                      | 1.0                                                         | 250    | 1         | ZrSiO <sub>4</sub>                                               |
| (14)  |                 |                                        |                                        |                                                             |        | 7         | ZrSiO <sub>4</sub>                                               |
| (15)  | 100:0           | 1.0                                    | 0                                      | 1.0                                                         | 250    | 7         | ZrSiO <sub>4</sub>                                               |
| (16)  |                 | 0.05                                   |                                        |                                                             |        |           | ZrSiO <sub>4</sub> + ZrO <sub>2</sub>                            |
| (17)  | 95:5            | 0.19                                   | 0.01                                   |                                                             |        |           | (Zr,Ce)SiO <sub>4</sub>                                          |
| (18)  | 90:10           | 0.18                                   | 0.02                                   |                                                             |        |           | (Zr,Ce)SiO <sub>4</sub>                                          |
| (19)  | 80:20           | 0.16                                   | 0.04                                   |                                                             |        |           | (Zr,Ce)SiO <sub>4</sub>                                          |
| (20)  | 60:40           | 0.12                                   | 0.08                                   |                                                             |        |           | (Zr,Ce)SiO <sub>4</sub> + ZrO <sub>2</sub>                       |
| (21)  | 50:50           | 0.10                                   | 0.10                                   | 1.0                                                         | 250    | 7         | (Zr,Ce)SiO <sub>4</sub> + ZrO <sub>2</sub><br>+ CeO <sub>2</sub> |
| (22)  | 40:60           | 0.08                                   | 0.12                                   |                                                             |        |           | (Zr,Ce)SiO <sub>4</sub> + ZrO <sub>2</sub><br>+ CeO <sub>2</sub> |
| (23)  | 30:70           | 0.06                                   | 0.14                                   |                                                             |        |           | ZrO <sub>2</sub> + CeO <sub>2</sub>                              |
| (24)  | 0:100           | 0                                      | 0.20                                   | 6.5                                                         | 150    | 7         | CeSiO <sub>4</sub>                                               |

**Table SI 2.** Unit cell parameters and volume obtained by Rietveld refinements made from the PXRD patterns of pristine ZrSiO<sub>4</sub> samples prepared under hydrothermal conditions ( $\Delta t = 20$  days,  $T = 250^\circ\text{C}$ ) with starting zirconium and silicate concentrations of  $0.2 \text{ mol}\cdot\text{L}^{-1}$  and with various initial pH values.

| Synthesis | pH <sub>ini</sub>                                         | <i>a</i> (Å) | <i>c</i> (Å) | <i>V</i> (Å <sup>3</sup> ) |
|-----------|-----------------------------------------------------------|--------------|--------------|----------------------------|
| (1)       | [HNO <sub>3</sub> ] = $1.0 \text{ mol}\cdot\text{L}^{-1}$ | 6.612(5)     | 5.973 (6)    | 261.1(7)                   |
| (2)       | 1.0                                                       | 6.627(4)     | 5.979(4)     | 262.6(5)                   |
| (3)       | 2.0                                                       | 6.627(3)     | 5.982(4)     | 262.7(4)                   |
| (4)       | 3.1                                                       | 6.628(5)     | 5.980(6)     | 262.7(7)                   |
| (5)       | 4.1                                                       | 6.623(4)     | 5.972(5)     | 262.0(5)                   |
| (6)       | 4.9                                                       | 6.625(7)     | 5.972(8)     | 262.1(9)                   |
| (7)       | 6.0                                                       | 6.625(5)     | 5.975(6)     | 262.2(7)                   |
| (8)       | 7.0                                                       | 6.621(7)     | 5.968(8)     | 261.6(9)                   |
| (9)       | 8.0                                                       | 6.618(7)     | 5.970(8)     | 261.5(9)                   |
| (10)      | 9.0                                                       | 6.614(6)     | 5.974(7)     | 261.3(8)                   |

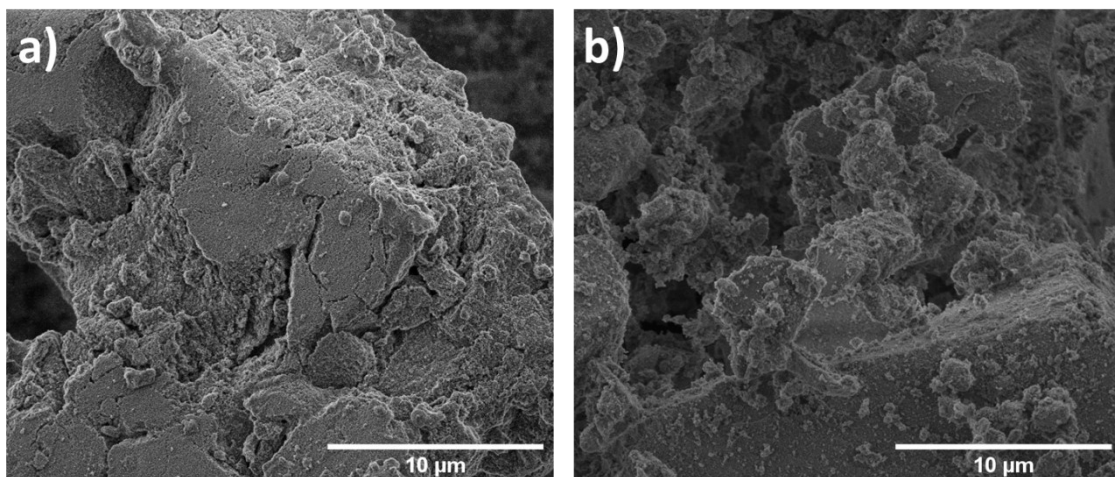

**Figure SI 1.** SEM micrographs recorded for **a)** pristine (14) and **b)** annealed (1000°C)  $\text{ZrSiO}_4$  sample prepared under hydrothermal conditions ( $T = 250^\circ\text{C}$ , 7 days,  $\text{pH} = 1.0$ ) starting with zirconium and silicate concentrations of  $0.2 \text{ mol}\cdot\text{L}^{-1}$ .

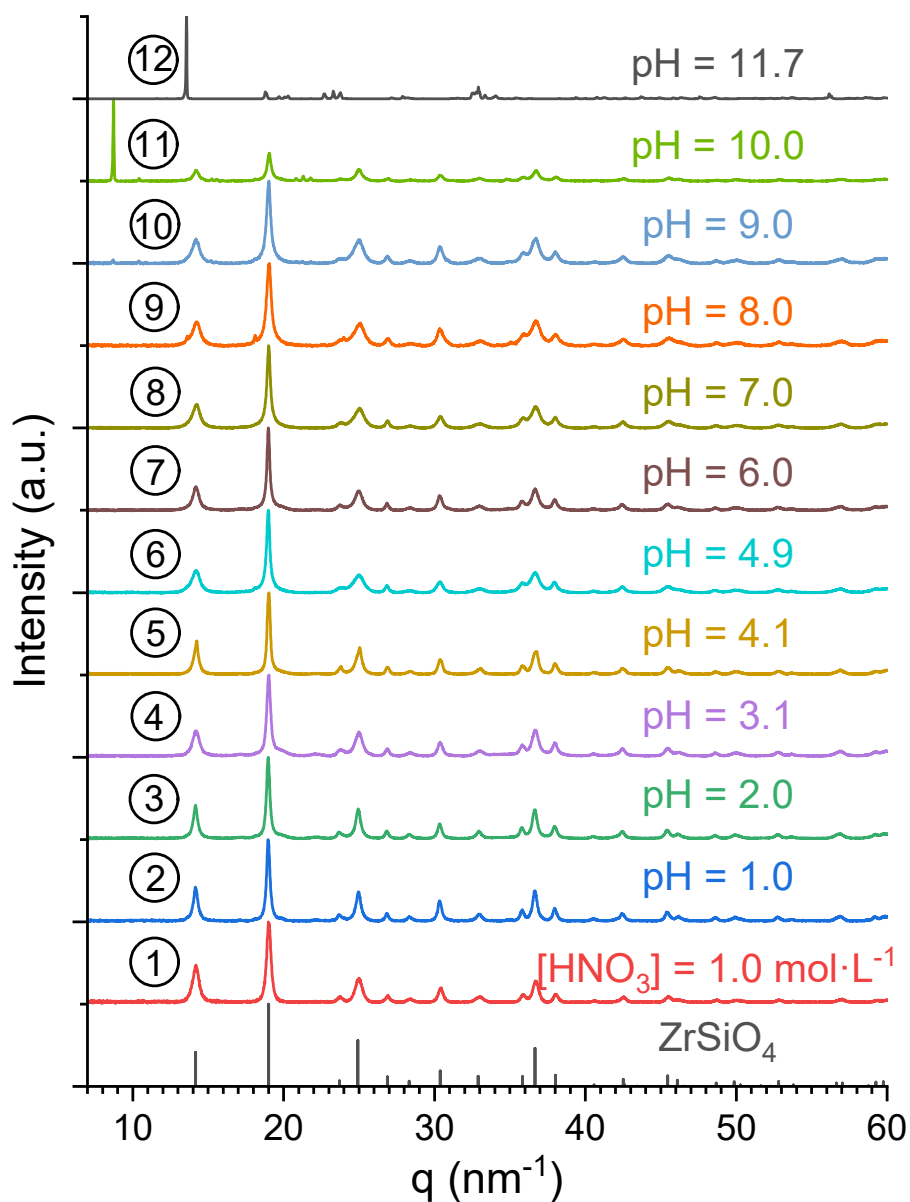

**Figure SI 2.** PXRD patterns obtained for  $\text{ZrSiO}_4$  samples prepared under hydrothermal conditions (20 days,  $T = 250^\circ\text{C}$ ) starting with zirconium and silicate concentrations of  $0.2 \text{ mol}\cdot\text{L}^{-1}$  and for various initial pH values:  $1.0 \text{ mol}\cdot\text{L}^{-1}$   $\text{HNO}_3$  (1), pH = 1.0 (2), pH = 2.0 (3), pH = 3.1 (4), pH = 4.1 (5), pH = 4.9 (6), pH = 6.0 (7), pH = 7.0 (8), pH = 8.0 (9), pH = 9.0 (10), pH = 10.0 (11) and pH = 11.7 (12), plotted in scattering vector.

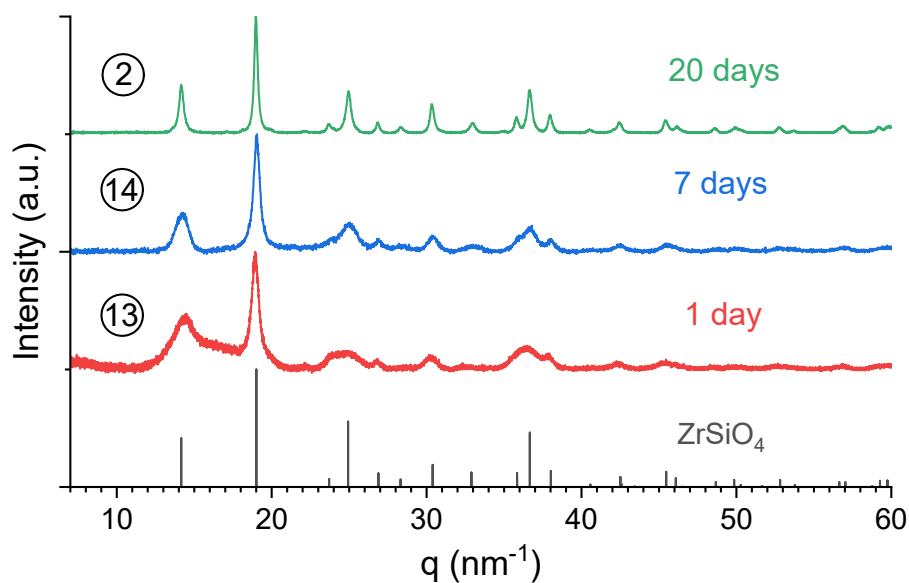

**Figure SI 3.** PXRD patterns obtained for ZrSiO<sub>4</sub> samples prepared under hydrothermal conditions ( $T = 250^\circ\text{C}$ ,  $\text{pH} = 1$ ) starting with zirconium and silicate concentrations of  $0.2 \text{ mol}\cdot\text{L}^{-1}$  and for holding time of 1 day (13), 7 days (14) and 20 days (2), plotted in scattering vector.

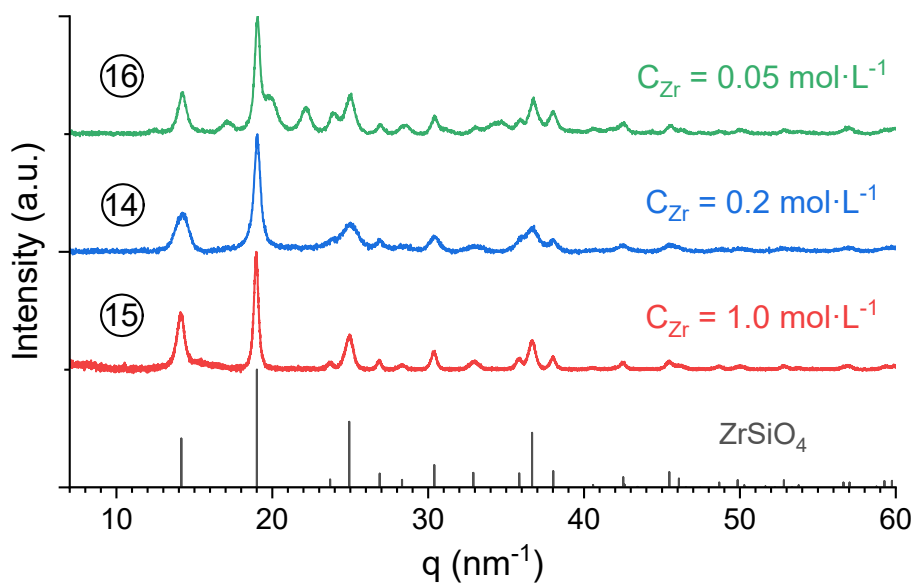

**Figure SI 4.** PXRD patterns obtained for ZrSiO<sub>4</sub> samples prepared under hydrothermal conditions ( $T = 250^\circ\text{C}$ , 7 days) at  $\text{pH} = 1.0$  starting with zirconium and silicate concentrations of  $1.0 \text{ mol}\cdot\text{L}^{-1}$  (15),  $0.2 \text{ mol}\cdot\text{L}^{-1}$  (14) and  $0.05 \text{ mol}\cdot\text{L}^{-1}$  (16), plotted in scattering vector.

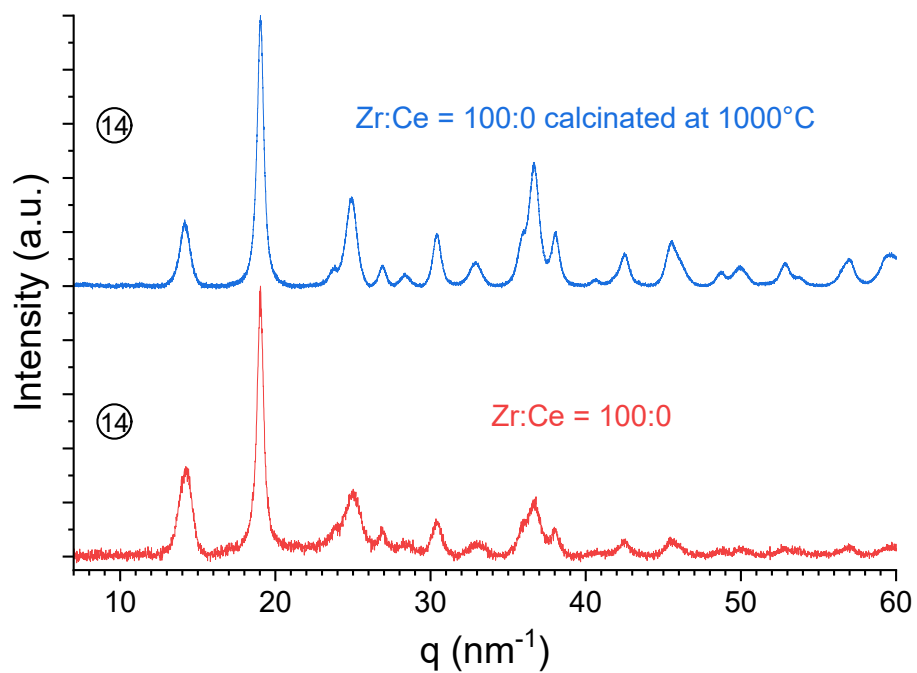

**Figure SI 5.** PXRD patterns recorded for a pristine and annealed (after TGA, 1000°C) ZrSiO<sub>4</sub> sample (14) prepared under hydrothermal conditions (T = 250°C, 7 days) at pH = 1.0 starting with zirconium and silicate concentrations of 0.2 mol·L<sup>-1</sup>, plotted in scattering vector.

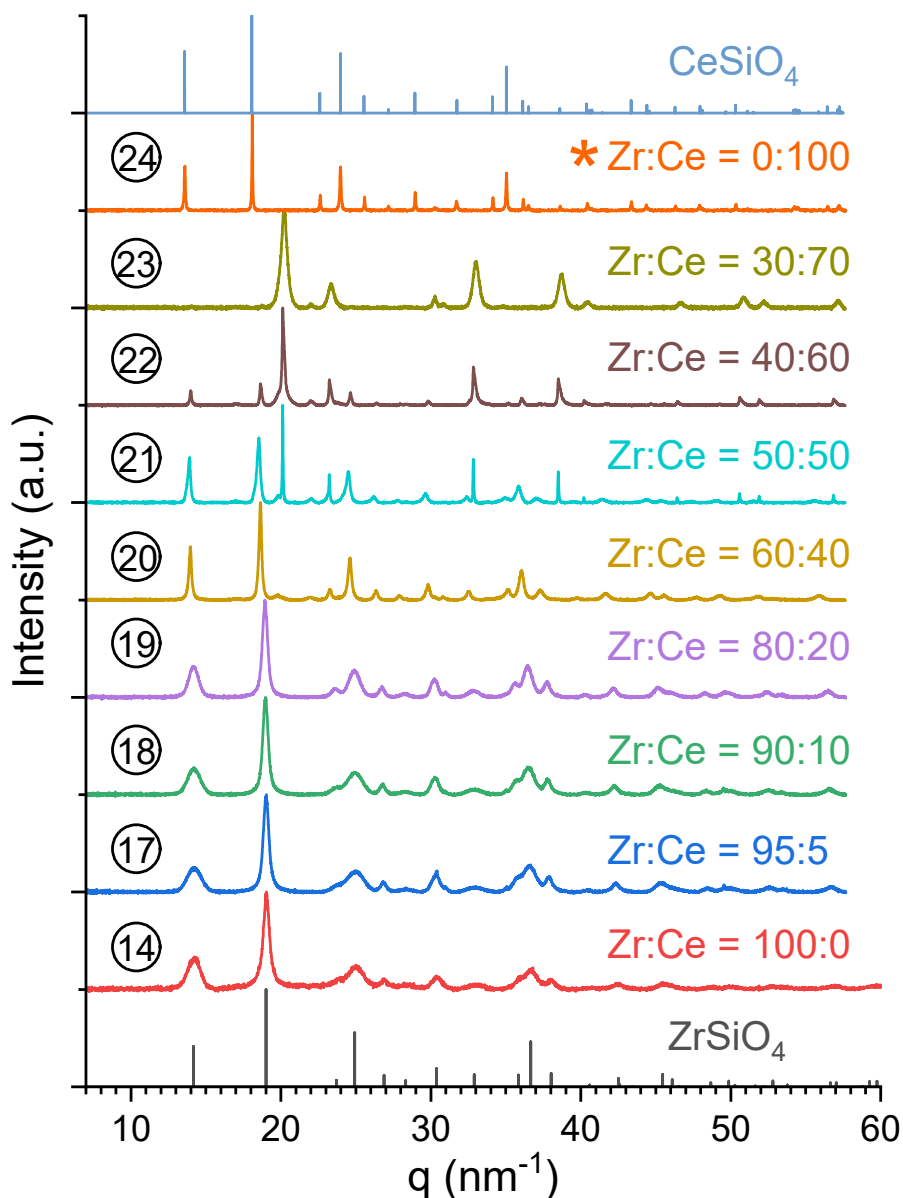

**Figure SI 6.** PXRD patterns recorded for pristine  $(\text{Zr,Ce})\text{SiO}_4$  solid solutions with various chemical compositions prepared under hydrothermal conditions ( $T = 250^\circ\text{C}$ , 7 days,  $\text{pH} = 1.0$ ) starting with Zr + Ce and silicate concentrations of  $0.2 \text{ mol}\cdot\text{L}^{-1}$  for Zr:Ce = 100:0 (14), 95:5 (17), 90:10 (18), 80:20 (19), 60:40 (20), 50:50 (21), 40:60 (22), 30:70 (23). \* Reference  $\text{CeSiO}_4$  sample ( $T = 150^\circ\text{C}$ , 7 days,  $\text{pH} = 6.5$ ) starting with cerium and silicate concentrations of  $0.2 \text{ mol}\cdot\text{L}^{-1}$  (24), plotted in scattering vector.



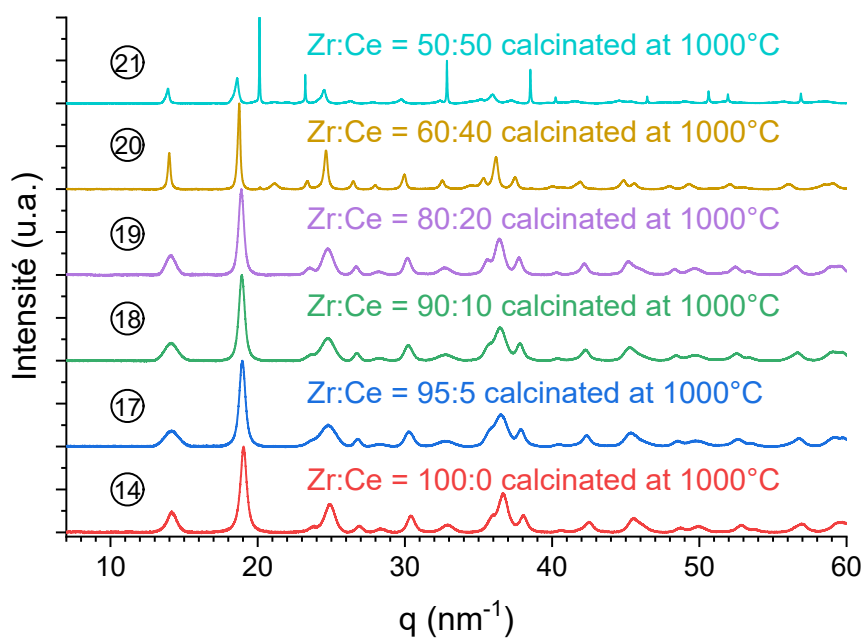

**Figure SI 7.** Synchrotron PXRD patterns recorded for  $(\text{Zr,Ce})\text{SiO}_4$  solid solutions annealed at  $1000^\circ\text{C}$  with Zr:Ce = 100:0 (14), Zr:Ce = 95:5 (17), Zr:Ce = 90:10 (18), Zr:Ce = 80:20 (19), Zr:Ce = 60:40 (20) and Zr:Ce = 50:50 (21) prepared under hydrothermal conditions ( $T = 250^\circ\text{C}$ , 7 days,  $\text{pH} = 1.0$ ) starting with Zr + Ce and silicate concentrations of  $0.2 \text{ mol}\cdot\text{L}^{-1}$ , plotted in scattering vector.

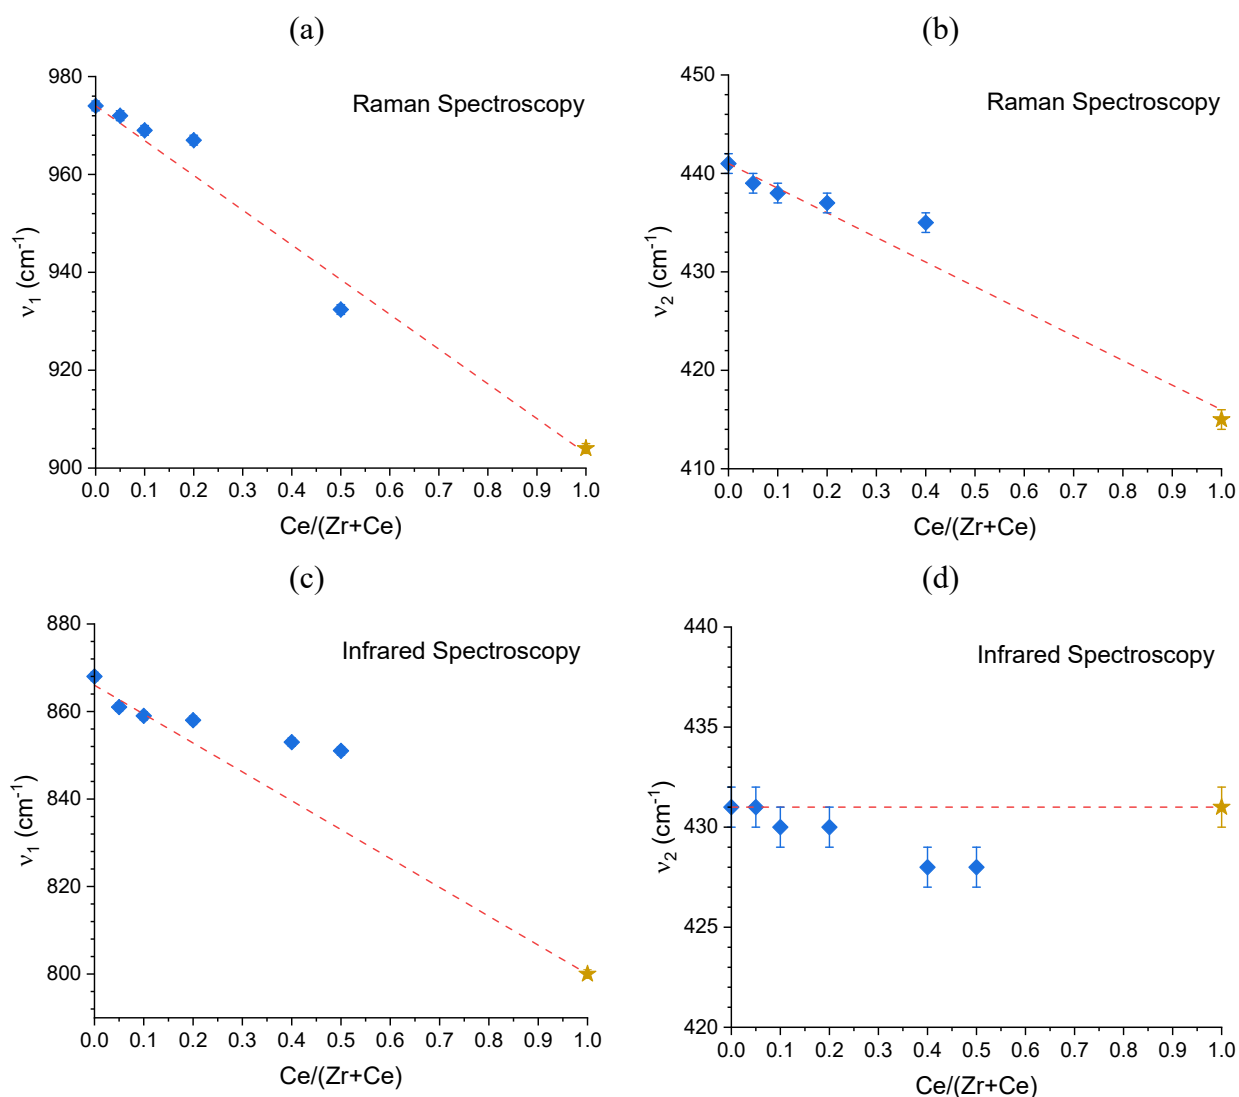

**Figure SI 8.** Variation of the  $\nu_1$  (a) and  $\nu_2$  (b) observed by Raman and  $\nu_1$  (c) and  $\nu_2$  (d) by IR spectroscopy for  $(\text{Zr,Ce})\text{SiO}_4$  (annealed samples at  $1000^\circ\text{C}$ ) versus the expected chemical composition. \* Reference  $\text{CeSiO}_4$  sample wasn't obtained in the same chemical conditions as the  $(\text{Zr,Ce})\text{SiO}_4$  samples.

$\nu_4$  is not observable for Raman spectroscopy, due to its low intensity.  $\nu_3$  band position was difficult to determine by IR spectroscopy was difficult to determine with a good accuracy due to its low intensity and nearness with  $\text{SiO}_2$  characteristic band. Moreover,  $\nu_1$  band position for  $\text{Zr}:\text{Ce} = 60:40$  by Raman spectroscopy was masked by  $\nu_3$  band and  $\nu_2$  band position for  $\text{Zr}:\text{Ce} = 50:50$  by Raman spectroscopy masked by  $\text{CeO}_2$   $T_{2g}$  band.

Errors bars for  $\nu_1$  bands position are smaller than the data point size ( $\pm 1 \text{ cm}^{-1}$ ).
